# Supplementary material for: The Cdc15 and Imp2 SH3 domains cooperatively scaffold a network of proteins that redundantly ensure efficient cell division in fission yeast
Source: PubMed Central journal article supplement — Mol Biol Cell. 2015 Jan 15;26(2):256–69. doi: 10.1091/mbc.E14-10-1451 (PMC4294673; doi:10.1091/mbc.e14-10-1451), 2015-01-15
Supplement: supp_E14-10-1451v1_CombinedSupMats.pdf [file supp_E14-10-1451v1_CombinedSupMats.pdf]

# Supplemental Materials

*Molecular Biology of the Cell*

Ren et al.

### Supplementary figure legends.

Figure S1. Localization kinetics of Spa2. A) Images from a movie of a *spa2-GFP cdc15-mCherry sid4-RFP* cell captured at 2.5-minute intervals. Scale bar, 5  $\mu\text{m}$ . B) Images at 5-minute intervals from independent representative movies (right and left panels) of *spa2-GFP cdc15-mCherry sid4-RFP* that were begun at different cell cycle stages. Scale bars, 5  $\mu\text{m}$ .

Figure S2. Localization kinetics of Rgf3 to the CR. A) Live cell images of the indicated strain. Scale bar, 5  $\mu\text{m}$ . B) Montages of images a movie of the indicated strain at 4-min intervals. Scale bars, 5  $\mu\text{m}$ .

Figure S3. Sequence comparison of Rgf3 homologs. Rgf3 sequences from the 4 indicated *Schizosaccharomyces* species were aligned with amino acid numbers corresponding to the last residue of each line provided to the right. Residues identical between all 4 proteins are in red, conserved residues are in blue, and the three Cdc15 and Imp2 SH3-binding sites are highlighted in cyan.

Figure S4. Characterization of Rgf3 and Spa2 association with Cdc15. A) All three predicted Cdc15<sub>SH3</sub> binding sites in Rgf3 at amino acids 154-160, 169-175 and 264-270 were mutated at their first proline position to alanines to make the 3PA mutant in a fragment of *rgf3* encoding residues 1-290 and tested for localization as GFP fusion proteins. Scale bar, 3  $\mu\text{m}$ . B) *spa2* $\Delta$  cells were grown at 32°C in YE medium, fixed and stained with methyl blue, and imaged. Scale bar, 3  $\mu\text{m}$ . C) The growth patterns of wildtype (wt) and *spa2* $\Delta$  cells at 32°C was assessed by staining the cells with calcofluor and determining the percentage of cells that were growing at one end (monopolar), both ends (bipolar), or undergoing septation. D) The indicated strain was grown at 25°C and stained live. Scale bar, 3  $\mu\text{m}$ .

Figure S5. Sequence comparison of Spa2 homologs. Spa2 sequences from the 4 indicated *Schizosaccharomyces* species were aligned with amino acid numbers corresponding to the last residue of each line provided to the right. Residues identical in all 4 proteins are in red, conserved residues are in blue, and the Cdc15 and Imp2 SH3-binding site is highlighted in cyan.

Figure S6. Pos1 and Spa2 localization dependencies. A) *pos1-GFP spa2* $\Delta$  cells were stained with 50  $\mu\text{M}$  Mitotracker and imaged live. B) The indicated strain was grown at 25°C and imaged live. Scale bar, 3  $\mu\text{m}$ .

Figure S7. Genetic interactions among SH3 network components. A) Tetrad analysis of the indicated crosses with the relevant genotypes of mating partners indicated. Schematics of 3 tetrads are provided with the relevant genotypes of progeny indicated. Underneath, images of representative germinated spores or colonies of the indicated genotypes are shown. B) Top panel: The indicated strains were grown at 25°C and shifted to 36°C for 6 hours and the percent of cells that remained attached following septation were counted.  $n \geq 300$  cells for each strain. Bottom panel: Representative

fixed and DAPI-stained images of the indicated strains are also shown from the 6 hour shift.

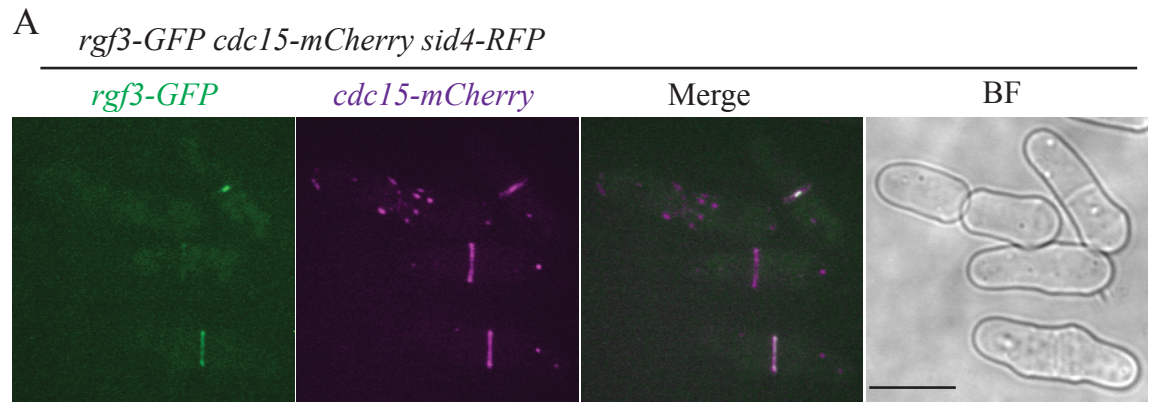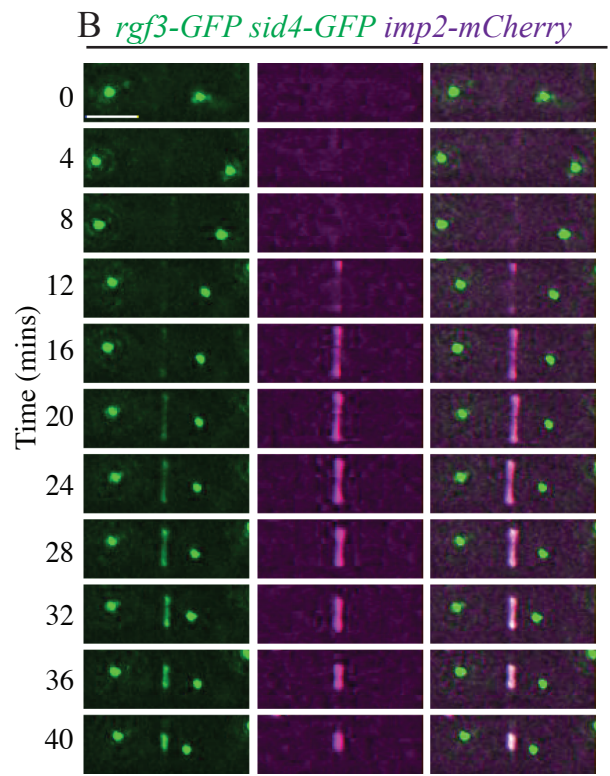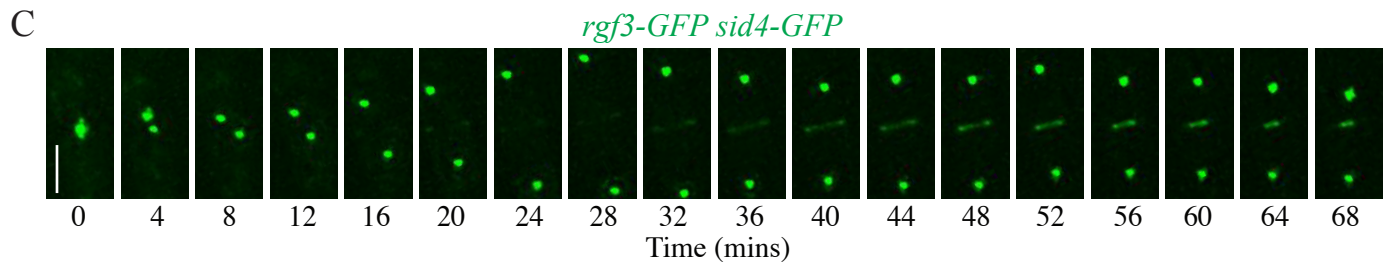

**Figure S1**



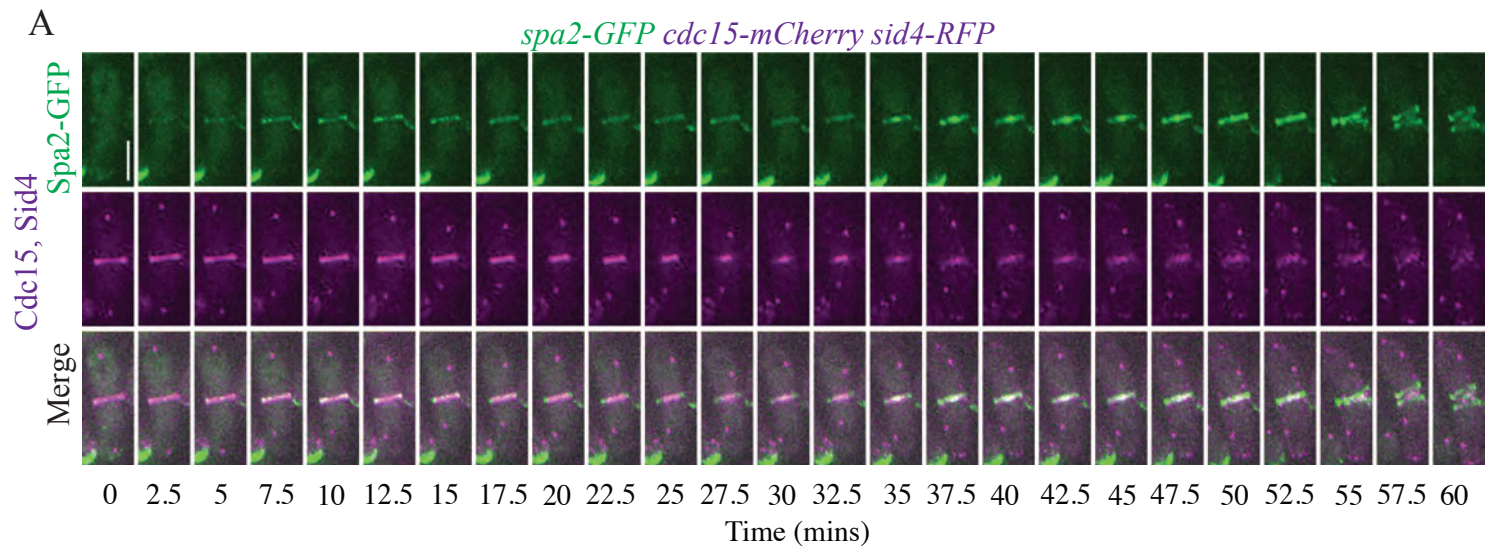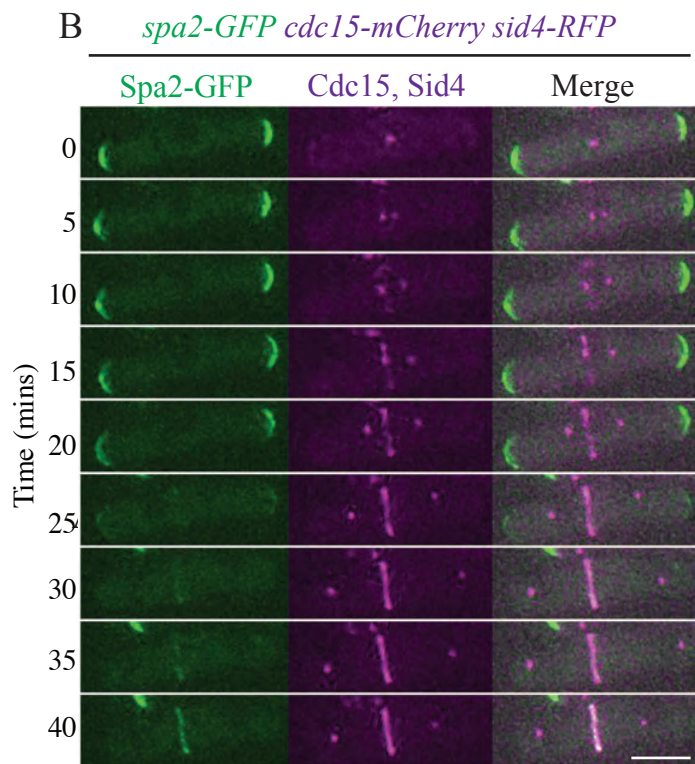

**Figure S2**

|                      |             |             |             |             |             |             |             |             |      |
|----------------------|-------------|-------------|-------------|-------------|-------------|-------------|-------------|-------------|------|
| <i>S. pombe</i>      | MKLSNELFHR  | SSKDHGGKSR  | ICLDSSSEDY  | PPHSSSP---  | ----PSFQKR  | LSFSDFSSTR  | LFSPPFLSKR  | SNNSPH-RFS  | 72   |
| <i>S. cryophilus</i> | MKLSNDIFRK  | NSRDERRRKR  | TSIDYPDDL   | ASPVSTP---  | -NISVPSPKR  | LSISDFSSFR  | LFSSPFNSPK  | RYDSTHSRQL  | 76   |
| <i>S. octosporus</i> | MKLSNDIFRK  | PSRHEHRNKR  | TSIDYPDDL   | ASPVSTPSS   | PNTSPVSPKR  | LSISDFSSFR  | LFSSPFNSPK  | RHESHTSRRL  | 80   |
| <i>S. pombe</i>      | YSPPOHPASI  | NSRRVASVTV  | QSSPSRTTYR  | QLNPENQNSA  | AYTTYSSFPN  | ALFDDFSPNN  | PLDTPDFLTS  | PGNKQNTVDS  | 152  |
| <i>S. cryophilus</i> | PMTPOSSRSL  | PSRRTASVTV  | RSSPALPTTS  | S--VYSYDAD  | PNGTVSSFPN  | ALHSNFSFSD  | PLDTPDPYLM  | PGGQYT--DV  | 152  |
| <i>S. octosporus</i> | PTTPPERPRL  | PSRRTTSVTV  | RSSPALPTMS  | S--NYLYDAD  | PNGTVSSFPN  | ALHTNFSPSD  | PLDIDPYLMS  | PG---T--DA  | 153  |
| <i>S. pombe</i>      | FRPLPETPVS  | PGGSLVHPLP  | RPPLPSSVSS  | HSSPYSTTSS  | TSLYSLYNDI  | SLSCSPEPYL  | PLSPTRSPAR  | TPSPIRLYSS  | 232  |
| <i>S. cryophilus</i> | HRPLPETP-S  | PTSPTS HPLP | RPPLLNTHSN  | NSSPYSSSSS  | NSFYTLYNEL  | PLSFSPEPYL  | PLSPTRSPSR  | STSPFR TAMN | 231  |
| <i>S. octosporus</i> | HRPLPETP-S  | PTSFTV HPLP | RPPLLSAHSN  | NSSPQSTSSS  | NSFYSLYNEQ  | PLSFSPEPYL  | PLSPSRSPSR  | STSPFR TAIN | 232  |
| <i>S. pombe</i>      | DALRPQSP--  | -----LSPS   | VEYLTP-PNP  | YSLKS---DI  | SSTRQLPKIP  | VQDYASGKIS  | SPLITRTHRR  | AQSETLFS    | 300  |
| <i>S. cryophilus</i> | EADNYSLSHI  | DSFGCWSDFP  | FTDLTSSPSP  | ANFPSPSQEL  | HISRELKVP   | VQDYTSGEIS  | SPLVSRSSRA  | TQANALFS    | 311  |
| <i>S. octosporus</i> | DANVNSVSQR  | DSYGYWSDPS  | FTDLTSSPSP  | VSFSSPNKEL  | HIPRELKVP   | ARQYASGDIS  | S LMSRSSRP  | TQANALFS    | 312  |
| <i>S. japonicus</i>  |             |             |             |             |             |             |             | MKC         | 3    |
| <i>S. pombe</i>      | REPWLVGKLY  | KWCKEEVFTA  | LGGLVHEGVS  | RREVAQVMAT  | LFTIHIASME  | FLIAEIIAKN  | ILGDWYINYL  | VEVINLEKQ   | 380  |
| <i>S. cryophilus</i> | REPWSLKRLF  | SWCKEEVFPA  | LSATTTD GAP | RQEVAQIMAI  | LFTMSVASMD  | FLIAEVLAKN  | IISDWIQNGY  | MKVTNLEKLY  | 391  |
| <i>S. octosporus</i> | REPWSLKRLF  | MWCCKEEVFPA | LSATTTD GAP | RQDLAQIMAM  | LFTIIVSPMD  | FLIAEVLAKN  | IISDWIQNGF  | MKVINLEKLY  | 392  |
| <i>S. japonicus</i>  | RDPWSLNSLY  | KWCRDVLAPL  | MVKQEEGGYY  | HYEVAQAMAT  | LFTLRIPKLD  | FLLAEMLAKN  | ILIDWIREGV  | VNVLNFEKLL  | 83   |
| <i>S. pombe</i>      | IAFTSNPEPS  | GSGLVPLFTN  | GGCYSYICRS  | RSCPSKYQCY  | SCRCARNSSL  | EFTSLPGQ-S  | SDTWSIFWNI  | SSLNSLPS    | 459  |
| <i>S. cryophilus</i> | ITFVDDQFPS  | SSGVLPIILN  | GGCYSYTCRS  | KASSSNYTCY  | SCRCVRIPAH  | RLTSTQGDFC  | DDSWNMFNWL  | SPQDSLPS    | 471  |
| <i>S. octosporus</i> | ITFVDDQFPS  | NGGVLPIILN  | GGCYSYTCRS  | KSTSSKYTCY  | TCRCVRKSTN  | GLTRSQGDTS  | DDSWNMFNWL  | SPQDSLPS    | 472  |
| <i>S. japonicus</i>  | IEFNHKEDLE  | HAGVLPALTT  | GGCYSYTCCS  | QDRSDKCACY  | SSRCLHSPLO  | KCFENAD--L  | SNSWNNYWNL  | PLSDELPL    | 161  |
| <i>S. pombe</i>      | SKREIARQNN  | IHELICKESD  | YVADLNTLAE  | LFRDGI VQOQ | DAIVPSNRVA  | DFIQSVFGNV  | ESIRQLHSRL  | FLPQLIMRER  | 539  |
| <i>S. cryophilus</i> | TKKEVARQNN  | IHELICKESD  | YVADLHTLAE  | LFRDGI VQEE | NSIVPSNRVA  | DFIQSVFGNV  | ESIRQLHSQF  | ILPQLIIRER  | 550  |
| <i>S. octosporus</i> | TKKEVARQNN  | IHELICKESD  | YVADLHTLAE  | LFRDGI VQEE | NSIVPSNRVA  | DFIQSVFGNV  | ESIRQLHSQF  | ILPQLIIRER  | 551  |
| <i>S. japonicus</i>  | TKKEITRQNN  | IHELICKESE  | YVADLDSLAD  | LFRDGLLKSE  | TDIIPLGRLA  | DFIQSVFGNV  | ETIRTIHSHR  | FLPQLLVREK  | 241  |
| <i>S. pombe</i>      | LQGPVVSIIIG | DILLEWIHAA  | KSSYINYAKQ  | FPLADETYKL  | ECQRNTYFAR  | WLAACRSDPR  | CRRLDFQHFL  | QRPTQRLQRY  | 619  |
| <i>S. cryophilus</i> | LQGPVVSIIIG | DILLEWIQMA  | KVSYINYAKQ  | FPLADETYKL  | ECQRNTYFAR  | WLAACRSDPR  | CRRLDFQHFL  | QRPTQRLQRY  | 630  |
| <i>S. octosporus</i> | LQGPVVSIIIG | DILLEWVHLA  | KTSYINYAKQ  | FPLADETYKL  | ECQRNTYFAR  | WLAACRSDPR  | CRRLDFQHFL  | QRPTQRLQRY  | 631  |
| <i>S. japonicus</i>  | LQGPVVSIIIG | DVILEWIRVA  | RDGYINYARQ  | FPLADETYKF  | ECQRNTCFAK  | WLAGCRMDPR  | CRRLDFQHFL  | QRPTQRLQRY  | 321  |
| <i>S. pombe</i>      | TLELDTILKH  | TEQSSWDFQL  | ITQAVKELRA  | TCEECDAVIA  | TVLEANRIRD  | LSYQLLFKNH  | ESVNLELRDP  | EREFFFEQIV  | 699  |
| <i>S. cryophilus</i> | TLEWDTILKH  | TDPTSWDYQL  | ISQAEKELRA  | TCEECDAVIA  | TVLEANRIRD  | LSYQLLFKNH  | ESINLELRDP  | EREFFFEQIV  | 710  |
| <i>S. octosporus</i> | TLEWDTILKH  | TDPTSWDYQL  | ISQAEKELRA  | TCEECDAVIA  | TVLESNRIRD  | LSYQLLFKNH  | EGINLELRDP  | EREFFFEQIV  | 711  |
| <i>S. japonicus</i>  | TLELNTILKH  | TDPESLDYKF  | LTQALKDIRA  | TCEECDAVIA  | TVLETNRIRD  | LSYQLLFKNH  | EHVNLDLRSP  | LREFFFEQEV  | 401  |
| <i>S. pombe</i>      | QRRSDSRLDW  | LDIHLFLLDN  | YLIMAKARKD  | KRTNASRYVV  | SKRPIPLDLL  | VLSPKMDDFQ  | LKSNTNKFLG  | SLAGNLPQE-  | 778  |
| <i>S. cryophilus</i> | FRKSESRLDW  | IEIHIFLLDN  | YFIMAKPRRD  | KRTNAMKFLV  | SKRPIPMDDL  | VLNPLTEEWN  | SRNSNKFLG   | SLTGNFPYDG  | 790  |
| <i>S. octosporus</i> | FRKSESRLDW  | IEIHIFLLDN  | YFIMAKARRD  | KRTNSMKYLV  | SKRPIPMDDL  | VLNPLIEEWN  | SRSS--KFLG  | TLASNFPYEG  | 789  |
| <i>S. japonicus</i>  | LKRSNSRLEW  | LNHLFLLDN   | YLVMTKVKRE  | RKSSATKYLV  | SKRPIPLDLL  | VVERIDDLSL  | HRSSPSRMFG  | NFSLTTSEGT  | 481  |
| <i>S. pombe</i>      | SLTTKSKRKS  | KV--NLELMP  | DATAEKNNEN  | SMNSAVFEKS  | QLYPFTIRHL  | GAYTASYTLY  | VESLQRLKLV  | VEKINVAKRR  | 856  |
| <i>S. cryophilus</i> | STNVRSKRKS  | RL--NLDILY  | DYNSDKMNEG  | SLNTLALAKQ  | HFYPTVVRHL  | GGLSSTYTYL  | TESLQRLKLV  | MDKINFARKR  | 868  |
| <i>S. octosporus</i> | SLNARSKRKS  | RL--NLDIRN  | DYNSDRMNE   | SWNNTLPEKP  | HFYPTVVRHL  | GGLSSTYTYL  | TESSQRLKLV  | MDKINFARKR  | 867  |
| <i>S. japonicus</i>  | FRTRRSSMRL  | NKFQSQSTLS  | EKHKRSNSDN  | TLSPGRSEKQ  | QLFAFAVRHL  | GRTPMTYTFY  | TETAQARKIW  | IEKLNFAQKR  | 561  |
| <i>S. pombe</i>      | HSQKINIKNP  | FALKVVDVA   | FQYPPSDLVN  | GNEPLNSFNE  | ITLVEGSSID  | RALNEVAWKH  | PIVSEELPE   | PIAYGDISCI  | 936  |
| <i>S. cryophilus</i> | HAQKMHKSP   | FALQIVSDVS  | FQYPPADLSH  | TFESSRSPE   | ISLVEGSAVD  | RALTMAAWRY  | PIHNEDDLPE  | AINYGDITCI  | 948  |
| <i>S. octosporus</i> | HAQKMRKNP   | FTLQIVSDVS  | FQYPPADISG  | TLDSSRSPE   | ISLVEGSAVD  | RALTMAAWRY  | PIHNEDDLPE  | AINYGDITCI  | 947  |
| <i>S. japonicus</i>  | HAQKQHDKVP  | FAAKVLDVVL  | FKDTSDBGYF  | NSSSQDSSAK  | IDLVEGSAVD  | RALQEASWKY  | PIPTAGDLPN  | AIASGPVFSI  | 641  |
| <i>S. pombe</i>      | AQFNDYEGHV  | SVLIATSTGI  | FLGAFGDSSD  | IRDWKKISSQ  | RRVTQLGVVE  | EPDILLELRD  | KTLYAHKLSR  | IIEMLIESK   | 1016 |
| <i>S. cryophilus</i> | AQFQGGADGKL | SICIATTTGV  | FLGFFGGNSN  | IREWRKISSH  | RRVMQIGLLE  | EPDCLLELRD  | RSMYAHKLSR  | VIEGTLEPK   | 1028 |
| <i>S. octosporus</i> | SQFQGGTDGKL | SICISTTTGV  | FLGFFGGNSN  | IREWRKISSH  | RRVTQIGFLE  | EPDCLLELRD  | RSMYAYRLSR  | VIESGTLEPK  | 1027 |
| <i>S. japonicus</i>  | AQFCLEGNTV  | SFFAATCNGV  | FYGEHGKDKD  | IRSWRKVFDH  | RRVTQLGVLE  | EPDCLLELRD  | KTLYAHKLSQ  | IIELTNPEPF  | 721  |
| <i>S. pombe</i>      | I----AVVIG  | TPHAVSFFKI  | GKLSEGASVK  | RERTLVFYKE  | GLGNTTIIIC  | CEPVIGLGHN  | YQKTYAFKRR  | DVTSFR TLDD | 1092 |
| <i>S. cryophilus</i> | V----AIPVG  | TSHNISFFKI  | SKLTEGASIK  | RERTLIFFKQ  | GSGNASSIHC  | CEPVVGLGHH  | NQKAYNFKQK  | NVSSFRILEE  | 1104 |
| <i>S. octosporus</i> | V----AIPVG  | NSHNISFFKI  | SKLTEGASLK  | RERTLIFFKQ  | GSGNSSSIHC  | CEPVVGLGHH  | NQKAYNFKLK  | NVSSFRILEE  | 1103 |
| <i>S. japonicus</i>  | VERGTAQVLG  | TPHAVSQFKI  | AKVEEGSLLK  | RSRTYILYKE  | MTGTFTFIRC  | CEPVVGFHGH  | YQKAYGFROK  | DVISFRVVDQ  | 801  |
| <i>S. pombe</i>      | FHVTANCHSI  | DCFKYSIALC  | HNKGIDVLR   | DPKLAVGFPS  | PSVLNDTLFR  | NRINNSKPLG  | VFRVHDP SLF | ACCYQFGAVF  | 1172 |
| <i>S. cryophilus</i> | FRVLADCYSM  | NCFKYSIAIS  | RQKGDIVLR   | DPKLAVGFPS  | PSVLTDPFYR  | SRINNSKPLG  | VFRVHDP SLF | ACCYHNGALF  | 1184 |
| <i>S. octosporus</i> | FRVLADCYSI  | NCFKYSIAIS  | RQKGDIVLR   | DPKLAVGFPS  | PSVLADPLYR  | SRLNSSKPLG  | VFRVHDP SLF | ACCYQTGALF  | 1183 |
| <i>S. japonicus</i>  | FQVTNDTSFA  | NVFKYSFAVT  | NSKGIEVIRL  | DPKLARNNIPS | QVSLYD SPAR | NFAMSSKPLS  | LLRTSKRGIF  | ACCYETGAVF  | 881  |
| <i>S. pombe</i>      | VNNEGSMVKN  | ECWFDWIGKP  | NSVTSCHGYL  | IAFNDEFVEI  | WNTRTRKLNQ  | IIQGNDIKYY  | PSNSDWLANG  | KYIMFGMVHP  | 1252 |
| <i>S. cryophilus</i> | VNNEGSLIKK  | DAWLQWIGRP  | NSVACYEGYL  | LAFSDDFIEI  | WNSRSMKQVQ  | VIQGNNIRLH  | ASNSDLLSDG  | KHVMFSMTHP  | 1264 |
| <i>S. octosporus</i> | VNNEGSLIKK  | DAWLQWIGRP  | NSIACHEGYL  | MAFSDDFIEI  | WNSRSMKQVQ  | IIQGNNIRLH  | SSNSDLLSDG  | KHVMFSMTHP  | 1263 |
| <i>S. japonicus</i>  | VTSEGLTTRT  | TEFINWLGTP  | EHVCMVGDYL  | LSPDKNFVEI  | WSTETLQLEQ  | IIQGNISIQYH | PSGSEWHPSG  | IMPVFSMTHP  | 961  |
| <i>S. pombe</i>      | QYHDRHLILA  | LNKAKTNSFI  | IED         | 1275        |             |             |             |             |      |
| <i>S. cryophilus</i> | QFHDRHLILA  | LDLVKEENLM  | DV          | 1286        |             |             |             |             |      |
| <i>S. octosporus</i> | QFHDRHLILA  | LDLVKEENLM  | D           | 1284        |             |             |             |             |      |
| <i>S. japonicus</i>  | VYPDRRLIMA  | LELTKLGNEL  | P           | 982         |             |             |             |             |      |

Figure S3

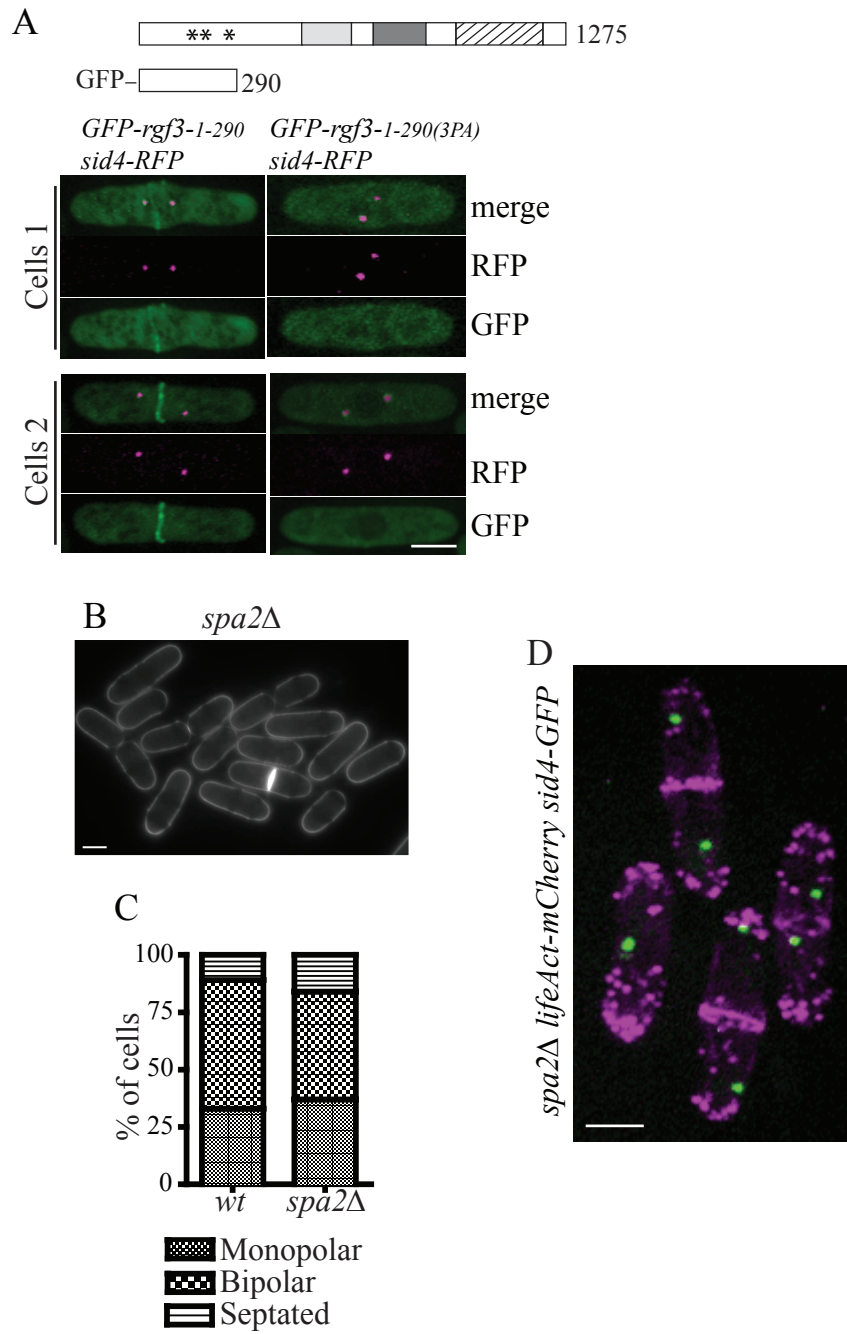

**Figure S4**

*S. pombe* MQSIIIRQYR FLARYLEPEF VKDPALRNAN ARPREDLQRL SHIQFSELLT DVADELQRI NNDPKVRFPL PVDSYHPKRN 80  
*S. octosporus* MQNIIIRQYR FLAKYLEPEF FKEPALRNAN ARPREDLQRL SHVQFSELLT DVADELQRI NNDPKVPFPL PVESYHPKRN 80  
*S. cryophilus* MQNIIIRQYR FLAKYLEPEF FKEPTLRNAN ARPREDLQRL SHVQFSELLT DVADELQRI NNDPKVPFPL PVESYHPKRN 80  
*S. japonicas* MRSIIIRQFR FLSRYLEPEF ARDPNL--VN SRSREKLQRL SHSQFNEELLT DVSEDLHRII NNDPNIPLPL SVDTFHPKRN 78

*S. pombe* HARQKLSSLA PTRLRDLCMD VFFEVSRYG GALKEVSSNT P-PNMTRAAS QPPQVQRLP ASAPKHDLYS SANASSASLH 159  
*S. octosporus* HARQKLASLA PSRLRDLCMD VYFEVQARYG NALKEVDTP TSLAQPSRTNS HPQVASQRNP SATHGVKAEG S---SSSSLH 157  
*S. cryophilus* HARQKLASLA PSRLRDLCMD VYFEVQARYN NALKEVDTP TMAQPNRTIS HPQLSSQRST QAAHGSKIEG P---SSSSLH 157  
*S. japonicas* HARQKMSTLA PLRLRDLCID VFELQTRYP AVVAE SPSNV SSSSLPNSSG APRTPTNATA SNASTASLGK A---SSPQYM 155

*S. pombe* PTEQRTTSSP TIPSYANRTH TDSPTSLSHR LPMVP----D TNALNTVQAN NSSTSSLSQG AQTGIDSSN YLSRIEMLES 235  
*S. octosporus* PSERRTTSSP NVV-NSKIAS REAPSSSSHA LPMVP----D AAPKSP---P HRVAE----- ----DSTTK YLAKIEMLEN 219  
*S. cryophilus* PLDRRTTSSP NVV-YPKKAS RETPSSSSHA LPMVP----D ATPKSPHRAP VPQTE----- ----DPSK YLAKIEMLEN 222  
*S. japonicas* PATTAINNQ PPRLPTPSSS SPSVSNMHR LPKA PHGRED VSISSYMTS PTASPSQQA IPVRSESPK FLSRIELLES 235

*S. pombe* SLAKSNSLLD SSKSEMEALK AKSISDATKH KNEIFQLEEK LHEASHEAEI SIKKLNDAN RIKEL----- ----ENNP 304  
*S. octosporus* NLAKSNSLLD VSKEIEELK AKLNSEAVHH KSRMFNMEEK LHEASLQITT LNEKLKESQL T----- ----RSTS 284  
*S. cryophilus* SLAKSNSLLD ISKSELEALK TKLNSEAVHH KGQLFNMEEK LHEMSLHVTT LNEKLKEAQN Q----- ----RSSS 287  
*S. japonicas* NLAkansLLD ANKAEMEAMT RQHTADQAKH KNELFQLEEK LHEAVHEKTT LSSQLEAAQK KIEELTKEVE KVNAABEERQ 315

*S. pombe* TLSFNPELEK NLKLMQELIV AESSKQHVIV ELESCLDLSK AETERWKKVA INAK-----S AKIDEDIRLF TMTTVPMSKI 379  
*S. octosporus* PAGVDGEFEK SLKMMQGLIL SETTKVHHIN ELEKSFEAQK DETERWKRVA INAK-----A SKIDDDVRLF TMNTIPMKTIV 359  
*S. cryophilus* PGLDSEVER SLKMMQGLIL SETAKVHHIN ELEKSFEAQK GETERWKRIA INAK-----A SKIDDDVRLF TMNTIPMKTIV 362  
*S. japonicas* TKRGNMELEE HLSQMRMLIQ AESKHLNELD EMQSQLERVK RESFQWKEKY YQVKLQNES A SKVDATACLF QNPPVSPETL 395

*S. pombe* RELISPNGLF DEQLYIRYFV EMNVFVASLR RDSPSQWMT AKDIALTLEA IVSSLREKSL LEELPDLGKK VDDLCSFTNS 459  
*S. octosporus* RELVSPNGIV DEQLYVRYFV EMNVFVSSLR KDSPSQWMT AKDIALTLEA IVSGLREAVL TKELLGLGSS IDDLCTFTNN 439  
*S. cryophilus* RELISPKGIV DEQLYVRYFV EMNVFVSSLR KDNP SQWMT AKDLALTLEA IVSSLREAAAL SDELPLRSS IDDLCTFTNN 442  
*S. japonicas* DKCTSDDGVF NRKDFVRYLF EMNEFIAATR SENSQLLTK MKSLAIVLDT LATQAREKSF ADS-SELMKH MDEVYIHADT 474

*S. pombe* LMEQVRLAVI NGALLPIYHV DASACISIS LMDIAKTYGL TNTGKSSLSV GRNSLHPVDD LKALSVAKTL LSEKSKQFSE 539  
*S. octosporus* LMQQVRVASS NGAF-PISHI DASACISIT LSEIVKKHGL LDSGKSSASY ARTSLHPVDD LKALSAAKTI LGDKTRRYNE 518  
*S. cryophilus* LMQQVRVTSS NGAL-PIGHI DASACISVA LLEIVKKYGL LDSGKSIASY ARTSLHPVDD LKALSAAKVI LADKTRRYNE 521  
*S. japonicas* LMLQVRNFAI NKGLTPLLHI DATAYTLSSV LINIVKQHQL HPDEMTRSSR G-DGTRAVNQ VETLSHVKEI VSKETDNLVA 553

*S. pombe* TNQKLLDAIS SDSSSSTIQ RVHEDINIVR DTLFDVSSPL ELMRDRAAYA VIHNALQEMR RYCMQLIEQE GHGENFGFTD 619  
*S. octosporus* VNQHLLNAIS DGRATYEVQ LIHVLTSIIR DTLFDVSAPL ELMRDRAAFG IIVHVSLEL R KCCMLLS DYE NQEQ----PS 594  
*S. cryophilus* VNQQVLNAIS DGRATYEVQ LIHISTSIIR DTLFDVSAPL EMMRDRAAFG IIVHVSLEL R KSCMLLC EYE RHEQ----PS 597  
*S. japonicas* GVQALVDSVH EHRSDADVYE GVRNIAAIVR DVLPDITPLV NQVSFAVDAS TVHDTLKALR DNRLRLDAQ DFDK----- 627

*S. pombe* NNSVPLTDL AFSAACFKD ILRAIEDAEF SVQRTQFSTR 659  
*S. octosporus* DPTIPPLTDL AFSTAKCFKN ILSIEDAEF TVQKTQFSNK 634  
*S. cryophilus* DSTIPPLTDL AFTTVKCFKN ILSIEDAEF TVQKTQFSSK 637  
*S. japonicas* EQSNTQLPDI AIATVAAYKQ LLRLIDDAEF QAQFGKPS 666

Figure S5



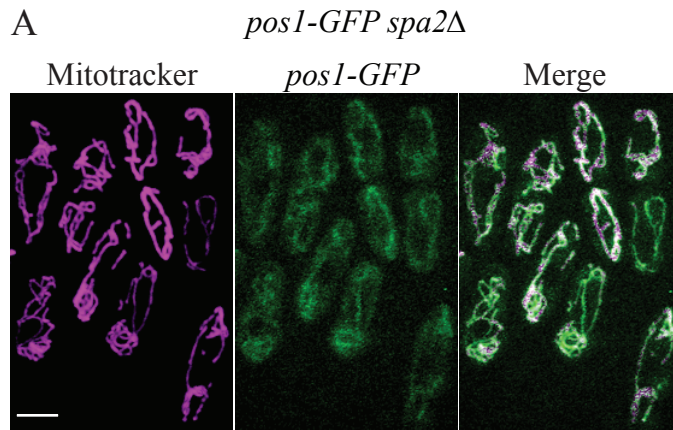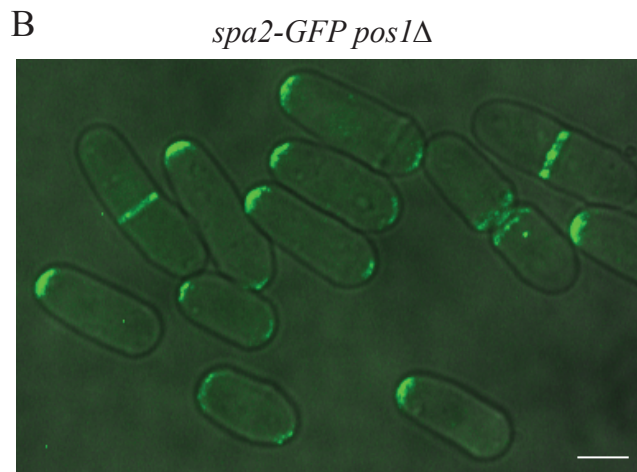

**Figure S6**

A

*imp2ΔSH3 x cdc15ΔSH3(1-869)*

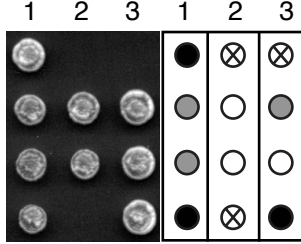

- wildtype
- *cdc15ΔSH3(1-869)*
- *imp2ΔSH3*
- ⊗ *imp2ΔSH3 cdc15ΔSH3(1-869)*

*imp2ΔSH3 cdc15ΔSH3(1-869)*

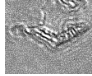

*imp2ΔSH3 x pxl1Δ*

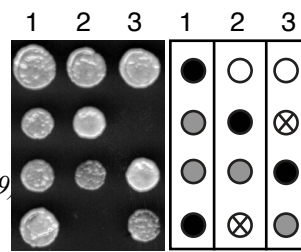

- wildtype
- *pxl1Δ*
- *imp2ΔSH3*
- ⊗ *imp2ΔSH3 pxl1Δ*

*pxl1Δ x cdc15ΔSH3(1-869)*

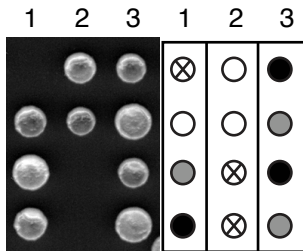

- wildtype
- *pxl1Δ*
- *cdc15ΔSH3(1-869)*
- ⊗ *pxl1Δ cdc15ΔSH3(1-869)*

*pxl1Δ cdc15ΔSH3(1-869)*

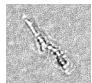

*cyk3Δ x cdc15ΔSH3(1-869)*

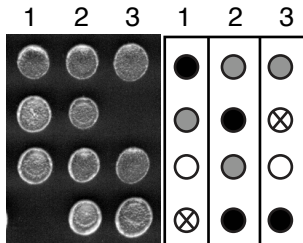

- wildtype
- *cdc15ΔSH3(1-869)*
- *cyk3Δ*
- ⊗ *cyk3Δ cdc15ΔSH3(1-869)*

*cyk3Δ cdc15ΔSH3(1-869)*

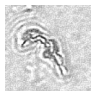

*pxl1Δ x art1Δ*

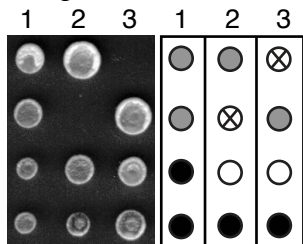

- wildtype
- *art1Δ*
- *pxl1*
- ⊗ *pxl1Δ art1Δ*

*pxl1Δ art1Δ*

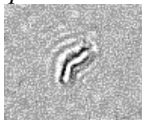

B

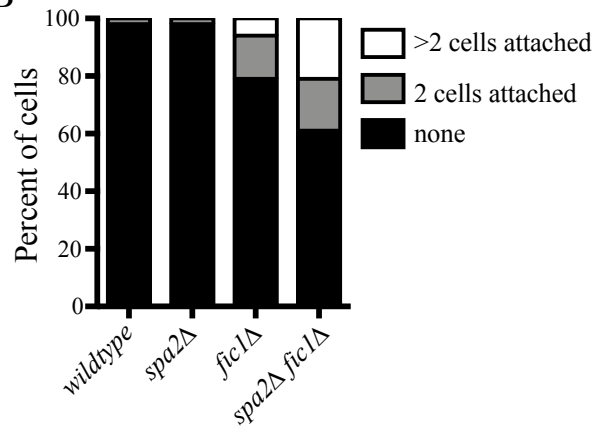

*spa2Δ fic1Δ, 36°C*

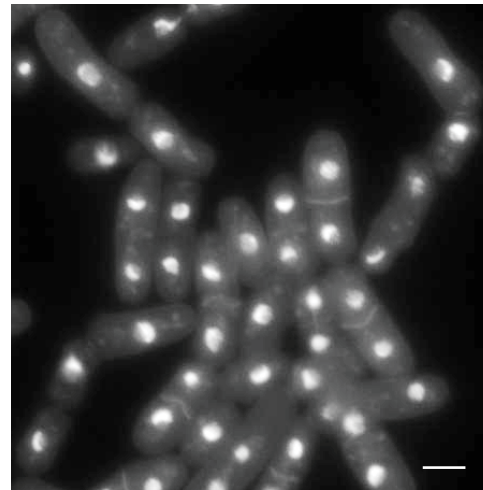

Figure S7

**TABLE S4** *S. pombe* strains used in this study

|                 |                                                                                                                                                  |            |
|-----------------|--------------------------------------------------------------------------------------------------------------------------------------------------|------------|
| <b>Figure 2</b> |                                                                                                                                                  |            |
| KGY4401         | <i>rgf3-MYC<sub>13</sub>:kan<sup>R</sup> ura4-D18 ade6-M210 leu1-32 h<sup>-</sup></i>                                                            | Lab stock  |
| KGY6894         | <i>spa2-FLAG<sub>3</sub>:kan<sup>R</sup> ura4-D18 ade6-M210 leu1-32 h<sup>-</sup></i>                                                            | This study |
| KGY7654         | <i>rgf3-TAP:kan<sup>R</sup> nda3-KM311 ade6-M21X leu1-32 ura4-D18 h<sup>+</sup></i>                                                              | Lab stock  |
| KGY6919         | <i>spa2-TAP:kan<sup>R</sup> nda3-KM311 ade6-M21X leu1-32 ura4-D18 h<sup>?</sup></i>                                                              | Lab stock  |
| <b>Figure 3</b> |                                                                                                                                                  |            |
| KGY11545        | <i>spa2-GFP:kan<sup>R</sup> cdc15-mCherry:kan<sup>R</sup> sid4-RFP:kan<sup>R</sup> ade6-M210 ura4-D18 leu1-32 h<sup>-</sup></i>                  | This study |
| KGY11704        | <i>spa2-GFP:kan<sup>R</sup> cdc15-mCherry:kan<sup>R</sup> nda3-KM311 ade6-M21X ura4-D18 leu1-32 h<sup>?</sup></i>                                | This study |
| KGY15778        | <i>cdc15-mCherry:kan<sup>R</sup> spa2-GFP:kan<sup>R</sup> ade6-M21X ura4-D18 leu1-32 h<sup>?</sup></i>                                           | This study |
| KGY14225        | <i>spa2-mCherry<sub>3</sub>:kan<sup>R</sup> sid4-RFP:kan<sup>R</sup> Imp2-GFP:kan<sup>R</sup> ade6-M21X ura4-D18 leu1-32 h<sup>?</sup></i>       | This study |
| KGY6670         | <i>sid4-GFP:kan<sup>R</sup> fic1-GFP:kan<sup>R</sup> ade6-M21X leu1-32 ura4-D18 h-</i>                                                           | Lab stock  |
| KGY7970         | <i>cyk3-GFP:kan<sup>R</sup> sid4-GFP:kan<sup>R</sup> leu1-32 ade6-M21X ura4-D18 h-</i>                                                           | Lab stock  |
| KGY16760        | <i>pos1-GFP:kan<sup>R</sup> sid4-GFP:kan<sup>R</sup> leu1-32 ade6-M21X ura4-D18 h<sup>?</sup></i>                                                | This study |
| KGY16759        | <i>pxl1-GFP:kan<sup>R</sup> sid4-GFP:kan<sup>R</sup> leu1-32 ade6-M21X ura4-D18 h<sup>?</sup></i>                                                | This study |
| <b>Figure 4</b> |                                                                                                                                                  |            |
| KGY9004         | <i>rgf3-GFP:kan<sup>R</sup> sid4-GFP:kan<sup>R</sup> cdc15Δ(1-752)-FLAG<sub>3</sub>:kan<sup>R</sup> ade6-M210 ura4-D18 leu1-32 h<sup>+</sup></i> | This study |
| KGY9007         | <i>rgf3-GFP:kan<sup>R</sup> sid4-GFP:kan<sup>R</sup> imp2ΔSH3-FLAG<sub>3</sub>:hyg<sup>R</sup> ade6-M216 ura4-D18 leu1-32 h<sup>-</sup></i>      | This study |
| KGY9012         | <i>spa2-GFP:kan<sup>R</sup> sid4-GFP:kan<sup>R</sup> cdc15Δ(1-752)-FLAG<sub>3</sub>:kan<sup>R</sup> ade6-M216 ura4-D18 leu1-32 h<sup>+</sup></i> | This study |
| KGY9014         | <i>spa2-GFP:kan<sup>R</sup> sid4-GFP:kan<sup>R</sup> imp2ΔSH3-FLAG<sub>3</sub>:hyg<sup>R</sup> ade6-M210 ura4-D18 leu1-32 h<sup>-</sup></i>      | This study |
| <b>Figure 5</b> |                                                                                                                                                  |            |
| KGY1296         | <i>PJ69-4A MATa trp1-190 leu2-3,112 ura3-52 his3-200 gal4Δ gal80Δ LYS2::GAL1-HIS3 GAL2-ADE2 met2::GAL-lacZ</i>                                   | Lab stock  |
| KGY11936        | <i>rgf3-GFP:kan<sup>R</sup> sid4-RFP:kan<sup>R</sup> ade6-M210 ura4-D18 leu1-32 h<sup>-</sup></i>                                                | This study |
| KGY16185        | <i>rgf3-3PA(P160A P172A P267A)-mGFP:kan<sup>R</sup> sid4-RFP:kan<sup>R</sup> ade6-M210 ura4-D18 leu1-32 h<sup>-</sup></i>                        | This study |
| KGY16265        | <i>rgf3-GFP:kan<sup>R</sup> sid4-RFP:kan<sup>R</sup> nda3-KM311 ade6-M210 ura4-D18 leu1-32 h<sup>?</sup></i>                                     | This study |
| KGY16266        | <i>rgf3-3PA(P160A P172A P267A)-mGFP:kan<sup>R</sup> sid4-RFP:kan<sup>R</sup> nda3-KM311 ade6-M210 ura4-D18 leu1-32 h<sup>?</sup></i>             | This study |
| KGY15643        | <i>rgf3-3PA(P160A P172A P267A)-mGFP:kan<sup>R</sup> ade6-M210 ura4-D18 leu1-32 h<sup>+</sup></i>                                                 | This study |
| KGY246          | <i>ade6-M210 ura4-D18 leu1-32 h<sup>-</sup></i>                                                                                                  | Lab stock  |
| <b>Figure 6</b> |                                                                                                                                                  |            |
| KGY15974        | <i>spa2-GFP:kan<sup>R</sup> ade6-M216 ura4-D18 leu1-32 h<sup>-</sup></i>                                                                         | This study |
| KGY15754        | <i>spa2-P191A-GFP:kan<sup>R</sup> ade6-M210 ura4-D18 leu1-32 h<sup>-</sup></i>                                                                   | This study |
